# Supplementary material for: Vapochromic and chemiresistive characteristics of a nanostructured molecular material composed of a zinc(ii)-salophen complex
Source: Royal Society of Chemistry journal article supplement (doi:10.1039/c8dt03904f), 2018-01-01
Supplement: c8dt03904f1.pdf [file c8dt03904f1.pdf]

# Electronic supplementary information (ESI)

## Vapochromic and chemiresistive characteristics of a nanostructured molecular material of a zinc(II)-salophen complex

Ivan Pietro Oliveri, Graziella Malandrino, Salvo Mirabella\* and Santo Di Bella\*

*Dipartimento di Scienze Chimiche, Università di Catania, I-95125 Catania, Italy.*

*E-mail: [salvatore.mirabella@ct.infn.it](mailto:salvatore.mirabella@ct.infn.it); [sdibella@unict.it](mailto:sdibella@unict.it)*

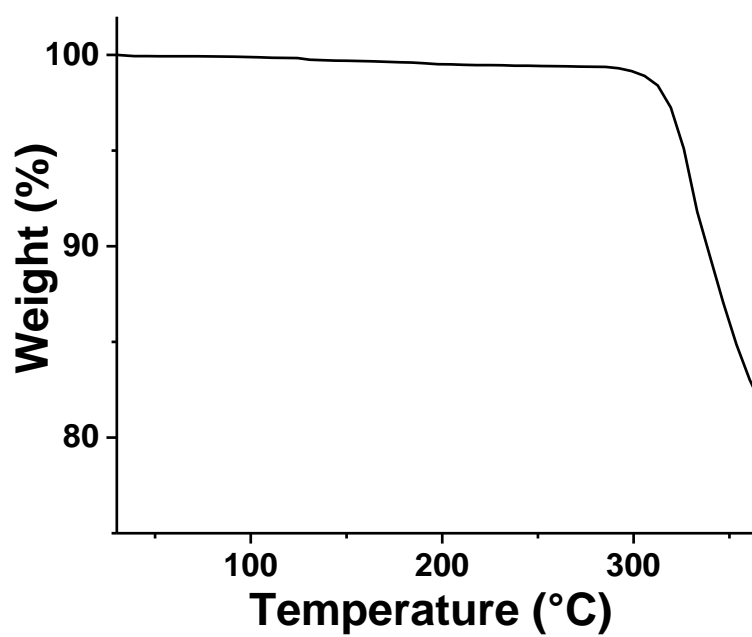

**Fig. S1** Thermogravimetric analysis (scan rate of 5 °C min<sup>-1</sup>) of the ground solid **1**.

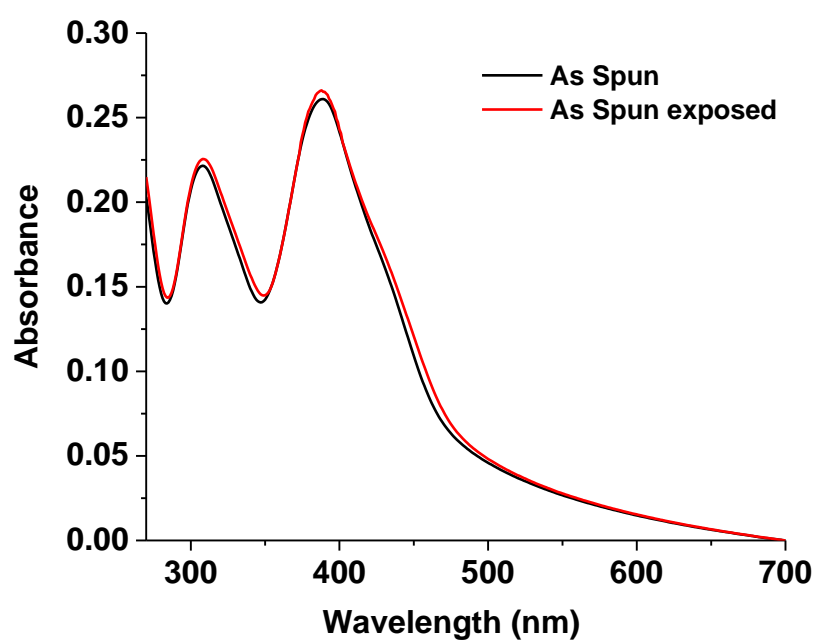

**Fig. S2** UV/vis absorption spectra of a spun coated film of **1** deposited onto a glass substrate from a  $1.0 \times 10^{-3}$  M THF solution, before (black line) and after (red line) exposure to saturated vapours of isopropylamine.

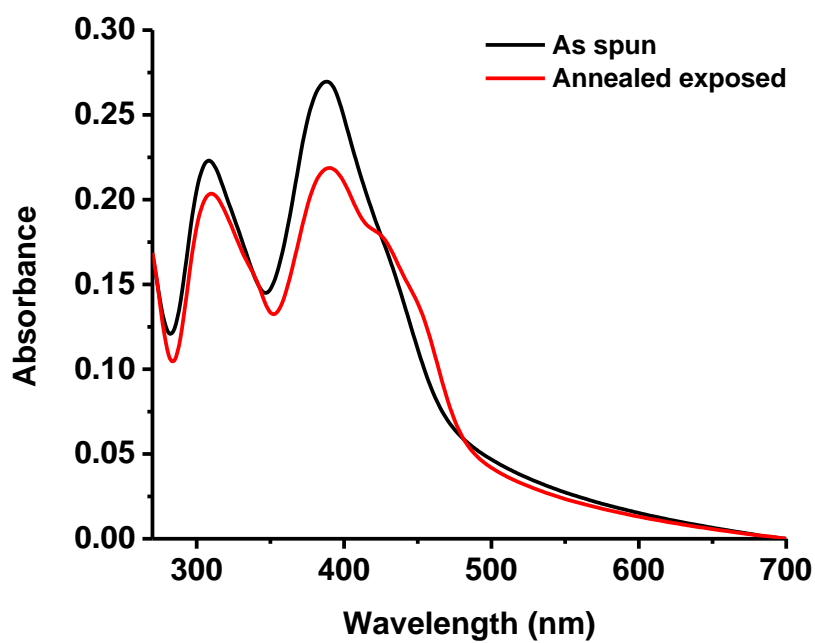

**Fig. S3** Comparison of the UV/vis absorption spectrum of a spun coated film of **1** and that of an annealed spun film after exposure to saturated vapours of isopropylamine.

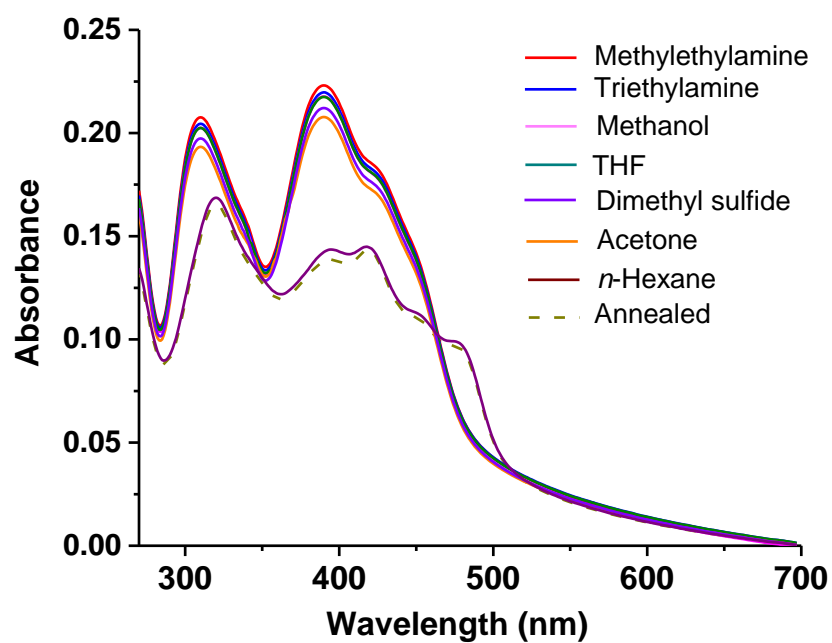

**Fig. S4** UV/vis absorption spectra of thermally annealed, spun films of **1** deposited onto a glass substrate from a  $1.0 \times 10^{-3}$  M THF solution after exposure to saturated vapours of volatile organic Lewis bases. The UV/vis absorption spectrum of a thermally annealed, spun film is reported for comparison.
